# Supplementary material
Source: PubMed Central journal article supplement (PMC2492607)
Supplement: pp.108.122226_1.pdf [file pp.108.122226_1.pdf]

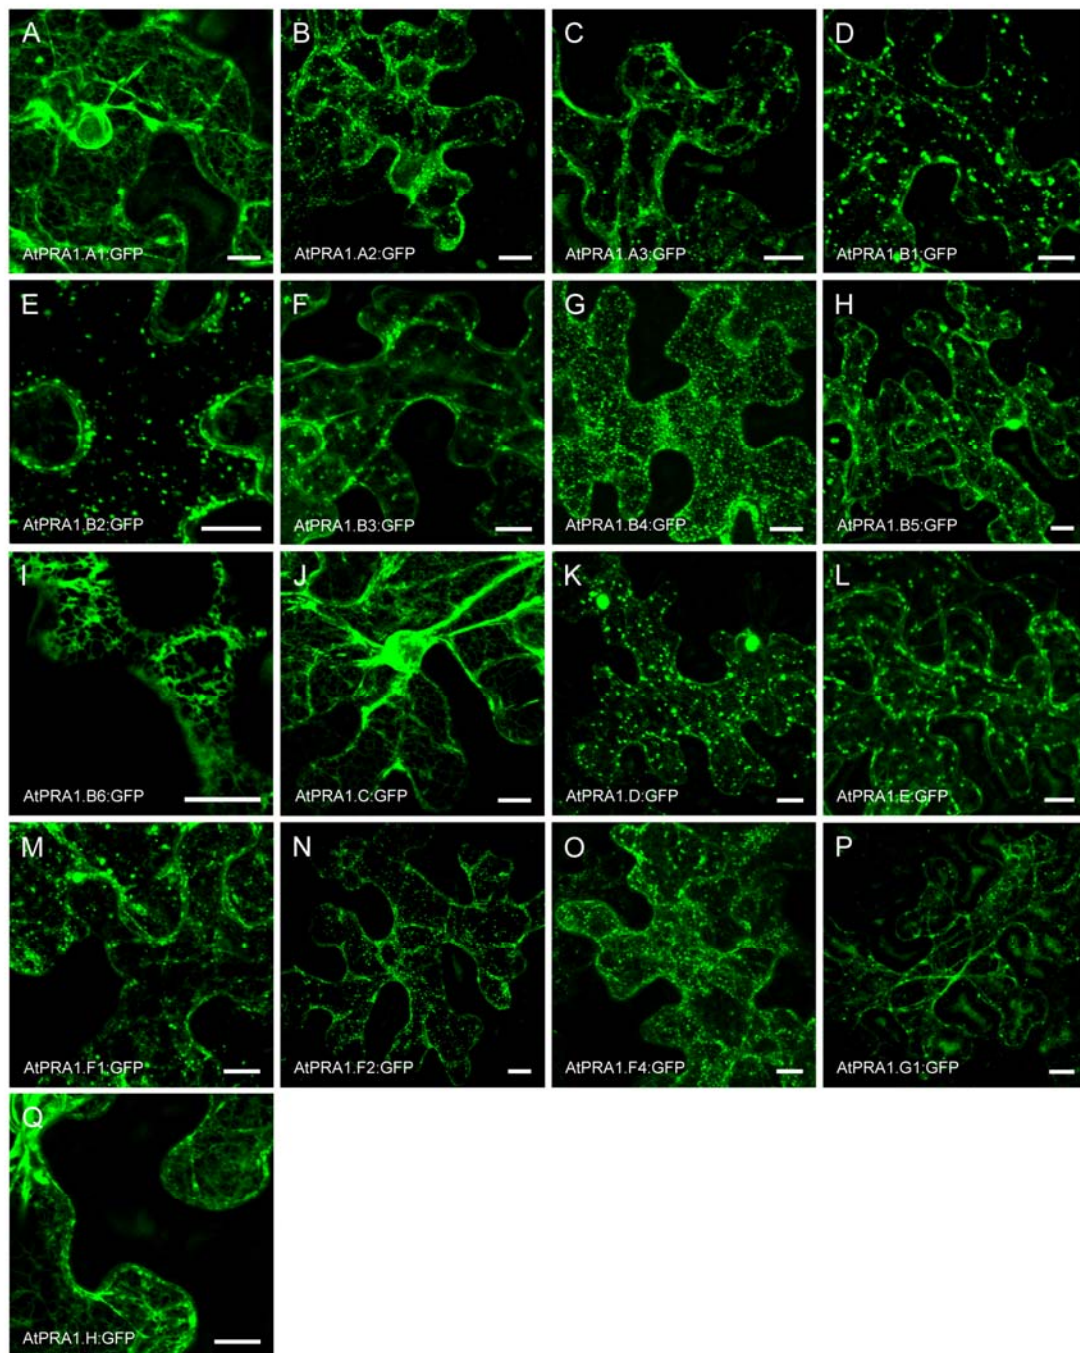

**Figure S1.** Subcellular distribution of AtPRA1 proteins in tobacco leaf epidermal cells. A, AtPRA1.A1; B, AtPRA1.A2; C, AtPRA1.A3; D, AtPRA1.B1; E, AtPRA1.B2; F, AtPRA1.B3; G, AtPRA1.B4; H, AtPRA1.B5; I, AtPRA1.B6; J, AtPRA1.C; K, AtPRA1.D; L, AtPRA1.E, M, AtPRA1.F1; N, AtPRA1.F2; O, AtPRA1.F4; P, AtPRA1.G1; Q, AtPRA1.H. Most AtPRA1 proteins were found as

vesicular organelles, often associated with a light network of ER strands. Four AtPRA1 proteins (AtPRA1.A1, AtPRA1.B6, AtPRA1.C, AtPRA1.H) showed a unique localization specific to the ER compartment. The proteins AtPRA1.F3 and AtPRA1.G2, showed expression indicative of ER localization, but no strong detectable GFP cells were found to be imaged (data not shown). Scale bar = 10  $\mu\text{m}$ .

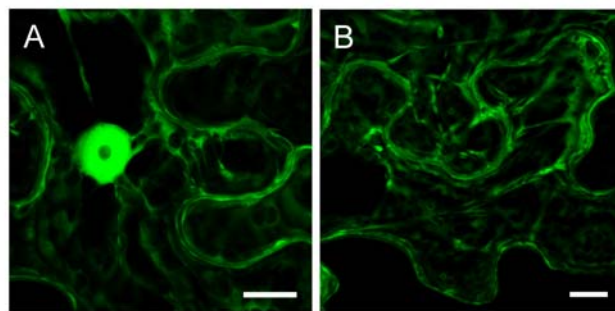

**Figure S2.** Subcellular distribution of free GFP protein in tobacco epidermal cells. A, Median section with nucleus; B, Cortical section. The expression of the GFP gene driven by the CaMV 35S promoter led to the fluorescent protein accumulation in the nucleus and the cytoplasm, denoted by thick transvacuolar strands. Scale bar = 10  $\mu$ m.

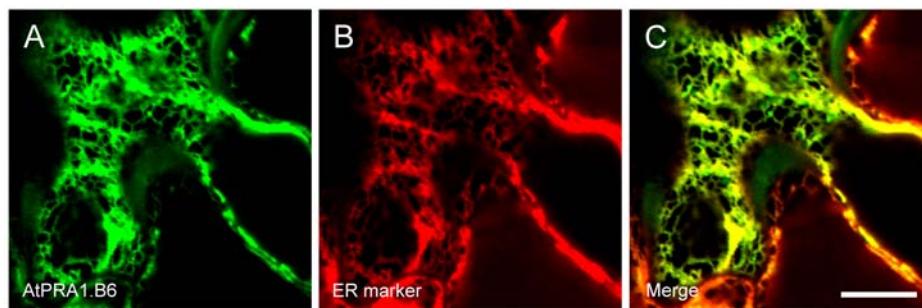

**Figure S3.** Subcellular distribution of AtPRA1.B6 over the ER in tobacco leaf epidermal cells. Out of the four ER-specific AtPRA1, AtPRA1.B6 was chosen as representative. The adopted ER marker corresponds to a chimeric fusion of the signal peptide AtWAK2 and the HDEL retention signal to the fluorescent marker gene. A, AtPRA1.B6; B, ER-marker; C, Merge. Scale bars = 10  $\mu\text{m}$ .

ncr2439 1 SSGIANRNSNRLRLSFFPDIKRLSKBNFAEMQSRNRYNHLGHSSNYAVVVMCIYALLTBNLFDIVFVAGMWFGLKDRGHRFTTSQLYTGGVL 100  
spo2994 1 YASRAQLYSGKSVGFLDVRRISSRNFSSEAGSRNFSNFRSSNYLAIITAMLVYALIRNE-LLLIVIGVGGVGYIRKLGADLQSHRVSINQNL 99  
sco5154 1 SPSLQSKLATHFPPQFFNFKKIKSKDNFGVQSVSNVYNNLHSSNYGLIIGCSISYITLL--TNLLLFVILVAVAGV--GNELVYFPF--SFKTNL 94  
dme4193 1 LQIFQVMNRSRNVVFFVINNKFTAISMQRNLSRIRNLSYFQNYVTFVFLMICYLITAPCILLVILASAFGCHKLR--VRNSNITVGCQLTSPQ 98  
cin8274 1 SPAAREWITQRRESFINTNKFRKSSISQWTKRSVKNMEHYQTNLNFVFSPELLIYCIITSPPELLLALLI--FLGACVYIHKNSNIKLGHBIHQ 98  
hsa16480 1 SGAGREWLERRRPMSTFVDQQRFSRERNLGEQCQRVVRNVEYQSNYVFLVGLLILYCVVTSPELLVALAVF-FGACYILYLRSLKLVFGREVS 99  
rno1287 1 SGAGREWLERRRPMSTFVDQQRFSRERNVGEQCQRVVRNVEYQSNYVFLVGLLILYCVVTSPELLVALAVF-FGACYILYLRSLKLVFGREVS 99  
mmu23371 1 SGAGREWLERRRPMSTFVDQQRFSRERNVGEQCQRVVRNVEYQSNYVFLVGLLILYCVVTSPELLVALAVF-FGACYILYLRSLKLVFGREVS 99  
dre9288 1 GNVIKDWDRRRPWAGFVDQRKFSKERNFGEQCQRVVRNLDYHSNYTFMALLIYCIISPELLLALGV--FAGAFYIHLTKKLVVFGRELTQGH 98  
ntii12462 1 ASVAKEWDRRRPWASFVDQRKFSKERNFGEMCQRVVRNVEYQSNYTFPLGLIYCIISPELLLALAVF-LGAFYIHLKLSKLVVFGRELTQGH 99  
Pt\_70836 1 TLTLDLKLKPVTFVGFDCGTYSRISIAQAKLMDENIRRYTGNYVLSAAVYVFLYQMLALVGLIAL-LVWDSLRAGDLDRNGY----RTL 94  
Op04g03780 1 ARALRGFPARAQWKSFAQLT-FAOBT-TASEVPGFRKMKLQOFGYVVSLSAAALAYNALSRALLAVMLAGA-FIGHYVTRVRRAPKTFICGRVFGAK 97  
Ot04g03930 1 VRALAYPVRASGWRAFAMM-RFSCPTASASEATSRARKAMSGFYGVVVMVAV----TAVLAVRRVVTAALAGCYLGHYVVKPIEVGKTVSVK 93  
cme517 1 LEWIQCWSAAQWPPFFDTKQFTAQGALELKERLAINIYYRGNMIIILCGCLLILALLRVIWVAAILL-FLYYSYFYQLENFYPPWTTTRKHVA 99  
Os81\_00405 1 ARLSTTDLAAPTWS-LAFGLGSYWPPTSQARLRVQBNVRRYARNAALSILWFACCLYHMHCHLPSLLVALIAFIACSQSLR-----RNSIRN 92  
AT4G27540.1 1 KLSADDFSGDTPWTTFTGNCYSYFSSSQARMRVHNKIKRFRNYATLPIVFFACALYQMLALVGLLGS-LALWELFYKCDRHFMSR-----KLS 93  
Pt\_827597 1 SKLTDDFSQGTWTRFADCGSYFSSGSDQARLRVHNKIKRFRNYATLPIVFFACALYQMLALVGLLGS-LALWELFYKCDRHFMSR-----QVM 93  
Pt\_834101 1 SKLTDDFSQGTWTRFADCGSYFSSGSDQARLRVHNKIKRFRNYATLPIVFFACALYQMLALVGLLGS-LALWELFYKCDRHFMSR-----QVM 93  
Ot07g01370 1 RTEAEFWPATAAATWREFFALKSIGFSCKAALALAKANTVFRFQNYVLSAAALAYNALSRALLAVMLAGA-FIGHYVTRVRRAPKTFICGRVFGAK 97  
Cr\_187088 1 ALKEVWTSAPR-VEVEFFR--SFSPRALM--GRKKNMYYRTRNYLVILVLAFLVCFIRNVALCSLVVLGTLACNDPFTALHLA--RKYAPGLV 92  
AT3G11397.1 1 ALREVEWTSAPRSLAEFFS--RFAPRSFSKWSRKLKQMLYYRTRNYLVILVLAFLVCFIRNVALCSLVVLGTLACNDPFTALHLA--RKYAPGLV 92  
AT5G05987.1 1 ALREVEWTSAPRSLAEFFS--RFAPRSFSKWSRKLKQMLYYRTRNYLVILVLAFLVCFIRNVALCSLVVLGTLACNDPFTALHLA--RKYAPGLV 92  
Pt\_563944 1 ALKEVDWTSAPRSLAEFFS--RFTIERSYSKWSRKLKQMLYYRTRNYLVILVLAFLVCFIRNVALCSLVVLGTLACNDPFTALHLA--RKYAPGLV 92  
Pt\_822444 1 ALKEIDWTSAPRSLAEFFS--RFTIERSYSKWSRKLKQMLYYRTRNYLVILVLAFLVCFIRNVALCSLVVLGTLACNDPFTALHLA--RKYAPGLV 92  
AT5G02040.1 1 ALREVDWTSAPRSLAEFFS--RFTIERSYSKWSRKLKQMLYYRTRNYLVILVLAFLVCFIRNVALCSLVVLGTLACNDPFTALHLA--RKYAPGLV 92  
Pt\_831908 1 ALREVDWTSAPRSLAEFFS--RFTIERSYSKWSRKLKQMLYYRTRNYLVILVLAFLVCFIRNVALCSLVVLGTLACNDPFTALHLA--RKYAPGLV 92  
Os67\_06293 1 ALREVDWTSAPRSLAEFFS--RFTIERSYSKWSRKLKQMLYYRTRNYLVILVLAFLVCFIRNVALCSLVVLGTLACNDPFTALHLA--RKYAPGLV 92  
Os82\_03597 1 ALREVDWTSAPRSLAEFFS--RFTIERSYSKWSRKLKQMLYYRTRNYLVILVLAFLVCFIRNVALCSLVVLGTLACNDPFTALHLA--RKYAPGLV 92  
Pt\_162836 1 ALKEVDWTSAPRSLAEFFS--RFTIERSYSKWSRKLKQMLYYRTRNYLVILVLAFLVCFIRNVALCSLVVLGTLACNDPFTALHLA--RKYAPGLV 92  
Pt\_221990 1 ALKEVDWTSAPRSLAEFFS--RFTIERSYSKWSRKLKQMLYYRTRNYLVILVLAFLVCFIRNVALCSLVVLGTLACNDPFTALHLA--RKYAPGLV 92  
Pt\_227785 1 ALKEVDWTSAPRSLAEFFS--RFTIERSYSKWSRKLKQMLYYRTRNYLVILVLAFLVCFIRNVALCSLVVLGTLACNDPFTALHLA--RKYAPGLV 92  
cme15147 1 QIMNGVEVPPRNEHLLDTRRYERNDFKKNWNRINSLNYLQTYNYVFTIITLFLHFTFISSQDIFVGLAVVAVIATLFLVAVKMM--RTHDPLV 96  
dme2861 1 ALSGNLQPPRFDLDDILGARSARLAAQDPQRWCHVWNNLNYLQTYNYVFTIITLFLHFTFISSQDIFVGLAVVAVIATLFLVAVKMM--RTHDPLV 96  
hsa23764 1 --MSEVRLPPIRALDDVLGARSARLAAQDPQRWCHVWNNLNYLQTYNYVFTIITLFLHFTFISSQDIFVGLAVVAVIATLFLVAVKMM--RTHDPLV 96  
mmu28592 1 --MSEVRLPPIRALDDVLGARSARLAAQDPQRWCHVWNNLNYLQTYNYVFTIITLFLHFTFISSQDIFVGLAVVAVIATLFLVAVKMM--RTHDPLV 96  
dre22987 1 --MVDFOPPPRLDLDLSSARFSLERNLDRWNNRINSLNYLQTYNYVFTIITLFLHFTFISSQDIFVGLAVVAVIATLFLVAVKMM--RTHDPLV 96  
tni2594 1 --MAGVQPPPRALDLDLSSARFSLERNLDRWNNRINSLNYLQTYNYVFTIITLFLHFTFISSQDIFVGLAVVAVIATLFLVAVKMM--RTHDPLV 96  
cin1427 1 ---SDIQLPPIRFDLDDILGARSARLAAQDPQRWCHVWNNLNYLQTYNYVFTIITLFLHFTFISSQDIFVGLAVVAVIATLFLVAVKMM--RTHDPLV 96  
tni26339 1 --MAKVELTPIRALDDVLGARSARLAAQDPQRWCHVWNNLNYLQTYNYVFTIITLFLHFTFISSQDIFVGLAVVAVIATLFLVAVKMM--RTHDPLV 96  
Pt\_230568 1 --MAKVELTPIRALDDVLGARSARLAAQDPQRWCHVWNNLNYLQTYNYVFTIITLFLHFTFISSQDIFVGLAVVAVIATLFLVAVKMM--RTHDPLV 96  
dre14921 1 ----MELAPRMDWDPYGVDRFSKSLDKWNNRINSLNYLQTYNYVFTIITLFLHFTFISSQDIFVGLAVVAVIATLFLVAVKMM--RTHDPLV 96  
hsa22741 1 ----MDVNLAPIRALDDVLGARSARLAAQDPQRWCHVWNNLNYLQTYNYVFTIITLFLHFTFISSQDIFVGLAVVAVIATLFLVAVKMM--RTHDPLV 96  
mmu22402 1 ----MDVNLAPIRALDDVLGARSARLAAQDPQRWCHVWNNLNYLQTYNYVFTIITLFLHFTFISSQDIFVGLAVVAVIATLFLVAVKMM--RTHDPLV 96  
rno21900 1 ----MDVNLAPIRALDDVLGARSARLAAQDPQRWCHVWNNLNYLQTYNYVFTIITLFLHFTFISSQDIFVGLAVVAVIATLFLVAVKMM--RTHDPLV 96  
cme1623 1 KERLQLAWSARPRWAAHALAPSSWLDWSARPRWAAHALAPSSWLDWSARPRWAAHALAPSSWLDWSARPRWAAHALAPSSWLDWSARPRWAAHALAP 99  
Pt\_594536 1 RARIIDLWTSAPRSLAEFFS--RFTIERSYSKWSRKLKQMLYYRTRNYLVILVLAFLVCFIRNVALCSLVVLGTLACNDPFTALHLA--RKYAPGLV 92  
Pt\_827148 1 TGNKRDDEPERE----FRLVCPFSISSPEAASLRIRNHLGHALYTHFWIIVLFIALIERKVSILFLVIMTVASLYLLDLRANFYLLDKIIDS 96  
AT5G56230.1 1 TGNKRDDEPERE----FRLVCPFSISSPEAASLRIRNHLGHALYTHFWIIVLFIALIERKVSILFLVIMTVASLYLLDLRANFYLLDKIIDS 96  
AT1G55640.1 1 IHNLTLSGRRRPMWBLVDRTPALGSLDEFSFSLLSLSEKNNLHFFNYITLIVSTCAAFALIASVAVLIVVGA--LAWLHFFHFRDEPLVFGYGDRTV 99  
AT1G55673.1 1 VHNLIASVSSVRPMSFELAFSGIDRPSFSFPAVSFKKLNHFFNYITLIVSTCAAFALIASVAVLIVVGA--LAWLHFFHFRDEPLVFGYGDRTV 99  
AT4G29658.1 1 LQNTFSPLIRPMBLRTSCSPTREDSFATALTRRANHHFFNYITLIVSTCAAFALIASVAVLIVVGA--LAWLHFFHFRDEPLVFGYGDRTV 99  
Op11g00150 1 KELISLGLSSQRWLELVQCSAFSLISFSVATERKSNMIFRTNYVIFIVSIFISMLWQVHLSVVFIL-IVAWLVYYSRDNPEPWFVFGSVIDDTLV 99  
Ot11g00120 1 KESAQHVWAQQPMSEIILDASAYARVVSFGDATSRQKNNLHFFNYITLIVSTCAAFALIASVAVLIVVGA--LAWLHFFHFRDEPLVFGYGDRTV 99  
AT1G04260.1 1 KDSAVHVWQQRPMSEIILDASAYARVVSFGDATSRQKNNLHFFNYITLIVSTCAAFALIASVAVLIVVGA--LAWLHFFHFRDEPLVFGYGDRTV 99  
Pt\_230928 1 KETAQSIIGAARWDFLDLDSAFSFPSSIADATTRVONLTHFLINYSIILSILGLTLITRPAITLAFIAV-GLAWFLYFAREEPLTIFGFTIIDDV 99  
AT1G08770.1 1 KETTKPLFSGRRRPMWBLVDRTPALGSLDEFSFSLLSLSEKNNLHFFNYITLIVSTCAAFALIASVAVLIVVGA--LAWLHFFHFRDEPLVFGYGDRTV 99  
AT1G17700.1 1 KQHTKRSGLATRRPKQMLDLSGNSFRKLAITVITRIRANTYVYFQNTNYLIVLVSFLVWNSPFLVLLVLL-LGAWLFLYFAREEPLTIFGFTIIDDV 99  
Pt\_595411 1 STSTQTLIATRPPQELIKLSSFIRBNYNDASIRKKNMIFRNVNNAIFLALFLSLLWHPSMIVFIVM-FVAVFLYFGRDGPVWVFNKSLDRDV 99  
Pt\_651854 1 ANTTNFATRRPWRRELEFSSFTRELSFGAATRRKNNLHFFNYITLIVLFLSLLWHPSMIVFIVM-FVAVFLYFGRDGPVWVFNKSLDRDV 99  
Pt\_551089 1 TNNSTIIFATRRPWRRELEFSSFTRELSFGAATRRKNNLHFFNYITLIVLFLSLLWHPSMIVFIVM-FVAVFLYFGRDGPVWVFNKSLDRDV 99  
Pt\_754227 1 --MASTIIFATRRPWRRELEFSSFTRELSFGAATRRKNNLHFFNYITLIVLFLSLLWHPSMIVFIVM-FVAVFLYFGRDGPVWVFNKSLDRDV 99  
Os67\_00962 1 KARGATALATRRPWRRELEFSSFTRELSFGAATRRKNNLHFFNYITLIVLFLSLLWHPSMIVFIVM-FVAVFLYFGRDGPVWVFNKSLDRDV 99  
Os82\_01045 1 KARGATALAERPRWRRELEFSSFTRELSFGAATRRKNNLHFFNYITLIVLFLSLLWHPSMIVFIVM-FVAVFLYFGRDGPVWVFNKSLDRDV 99  
Pt\_288981 1 KERIKAGLGTQPKWVMPNFRSFPNFGTSLDALARVKNLHFFNYITLIVLFLSLLWHPSMIVFIVM-FVAVFLYFGRDGPVWVFNKSLDRDV 99  
AT1G55190.1 1 KHRIKSGLATRRPKQMLDLSGNSFRKLAITVITRIRANTYVYFQNTNYLIVLVSFLVWNSPFLVLLVLL-LGAWLFLYFAREEPLTIFGFTIIDDV 99  
AT3G13710.1 1 KQRIKGLATRRPKQMLDLSGNSFRKLAITVITRIRANTYVYFQNTNYLIVLVSFLVWNSPFLVLLVLL-LGAWLFLYFAREEPLTIFGFTIIDDV 99  
AT3G13720.1 1 KHRIKAGLATRRPKQMLDLSGNSFRKLAITVITRIRANTYVYFQNTNYLIVLVSFLVWNSPFLVLLVLL-LGAWLFLYFAREEPLTIFGFTIIDDV 99  
Cr\_171434 1 KEVAGVAVRQQRWAEVVDNRNFSKGNLAEATSRKNNLHFFNYITLIVLMLCTAFTVFLHPSLLVLLAL-AGSWIVVFLMTRTFLVIGSSEK 99  
Os69\_05922 1 RAVAGAAARQQRWAEVVDNRNFSKGNLAEATSRKNNLHFFNYITLIVLMLCTAFTVFLHPSLLVLLAL-AGSWIVVFLMTRTFLVIGSSEK 99  
Os69\_05367 1 REQQALIAARPRWAEVVDNRNFSKGNLAEATSRKNNLHFFNYITLIVLMLCTAFTVFLHPSLLVLLAL-AGSWIVVFLMTRTFLVIGSSEK 99  
Pt\_216234 1 QDAFNLAQRRPWRRELEFSSFTRELSFGAATRRKNNLHFFNYITLIVLFLSLLWHPSMIVFIVM-FVAVFLYFGRDGPVWVFNKSLDRDV 99  
Pt\_109789 1 QDAFNLAQRRPWRRELEFSSFTRELSFGAATRRKNNLHFFNYITLIVLFLSLLWHPSMIVFIVM-FVAVFLYFGRDGPVWVFNKSLDRDV 99  
Pt\_119721 1 QDAFNLAQRRPWRRELEFSSFTRELSFGAATRRKNNLHFFNYITLIVLFLSLLWHPSMIVFIVM-FVAVFLYFGRDGPVWVFNKSLDRDV 99  
Pt\_196148 1 QDAFNLAQRRPWRRELEFSSFTRELSFGAATRRKNNLHFFNYITLIVLFLSLLWHPSMIVFIVM-FVAVFLYFGRDGPVWVFNKSLDRDV 99  
AT5G07110.1 1 LATVRHASADARPWRRELEFSSFTRELSFGAATRRKNNLHFFNYITLIVLFLSLLWHPSMIVFIVM-FVAVFLYFGRDGPVWVFNKSLDRDV 99  
Pt\_809747 1 FSSLRTTILSHRRPWRRELEFSSFTRELSFGAATRRKNNLHFFNYITLIVLFLSLLWHPSMIVFIVM-FVAVFLYFGRDGPVWVFNKSLDRDV 99  
Os86\_00075 1 LDSVKRALSGARPWRRELEFSSFTRELSFGAATRRKNNLHFFNYITLIVLFLSLLWHPSMIVFIVM-FVAVFLYFGRDGPVWVFNKSLDRDV 99  
Osl1687\_00 1 LDSVKRALSGARPWRRELEFSSFTRELSFGAATRRKNNLHFFNYITLIVLFLSLLWHPSMIVFIVM-FVAVFLYFGRDGPVWVFNKSLDRDV 99  
Os67\_06093 1 NPAAGGSAPSS--GALATDA-PLATRFLFEATSRKNNLHFFNYITLIVLFLSLLWHPSMIVFIVM-FVAVFLYFGRDGPVWVFNKSLDRDV 99  
Os82\_03767 1 SDSARRSLDRPRWBLVDRTPALGSLDEFSFSLLSLSEKNNLHFFNYITLIVLFLSLLWHPSMIVFIVM-FVAVFLYFGRDGPVWVFNKSLDRDV 99  
AT5G01640.1 1 TETVCGGLSRSPWBLVDRTPALGSLDEFSFSLLSLSEKNNLHFFNYITLIVLFLSLLWHPSMIVFIVM-FVAVFLYFGRDGPVWVFNKSLDRDV 99  
Pt\_724377 1 STSIRQGFSSQRWBLVDRTPALGSLDEFSFSLLSLSEKNNLHFFNYITLIVLFLSLLWHPSMIVFIVM-FVAVFLYFGRDGPVWVFNKSLDRDV 99  
Pt\_832605 1 STSIRQGFSSQRWBLVDRTPALGSLDEFSFSLLSLSEKNNLHFFNYITLIVLFLSLLWHPSMIVFIVM-FVAVFLYFGRDGPVWVFNKSLDRDV 99  
AT5G05380.1 1 SSSIRQGLSQRWBLVDRTPALGSLDEFSFSLLSLSEKNNLHFFNYITLIVLFLSLLWHPSMIVFIVM-FVAVFLYFGRDGPVWVFNKSLDRDV 99  
AT2G40380.1 1 SSSIRQGLSQRWBLVDRTPALGSLDEFSFSLLSLSEKNNLHFFNYITLIVLFLSLLWHPSMIVFIVM-FVAVFLYFGRDGPVWVFNKSLDRDV 99  
AT3G56110.1 1 STSIRQGLSQRWBLVDRTPALGSLDEFSFSLLSLSEKNNLHFFNYITLIVLFLSLLWHPSMIVFIVM-FVAVFLYFGRDGPVWVFNKSLDRDV 99  
AT2G38360.1 1 STSIRQGLSQRWBLVDRTPALGSLDEFSFSLLSLSEKNNLHFFNYITLIVLFLSLLWHPSMIVFIVM-FVAVFLYFGRDGPVWVFNKSLDRDV 99  
Pt\_560953 1 TESVRNGLSKRRPWRRELEFSSFTRELSFGAATRRKNNLHFFNYITLIVLFLSLLWHPSMIVFIVM-FVAVFLYFGRDGPVWVFNKSLDRDV 99  
Pt\_577062 1 TESVRNGLSKRRPWRRELEFSSFTRELSFGAATRRKNNLHFFNYITLIVLFLSLLWHPSMIVFIVM-FVAVFLYFGRDGPVWVFNKSLDRDV 99

ncr2439 101 SKELGNRFASLRFTDNVHLSALARIIDVKLTKLAALERYQRVSRPLPSGREGQSSSPFHYSYV 161  
spo2994 100 YVILACVLIPLGLFASPIETIILWLGASCVCVFGHAAFFPEPSAFET-----VEQQV 151  
sce5154 95 YTLGVCVAVPFGFLASPISTLWLIGASAVSFGHSLMEKPTVFDEE-----TV----- 144  
dme4193 99 IIALNLIAAPVWFLFVAGAVLFWTLGASCFVIMBAIFVYNDVTEENE-----GFLAQVV 153  
cin8274 99 YAVAGALFPLFFVAGAGAAVFWVLGVSFLVALHASFHISPGTTEDE-----TFMFTV 153  
hsa16480 100 YALAGGIFFPFFWLAGAGSAVFWVLGATLVVIGSBAAFHQ-----IEAVD-GEQMEPV 151  
rno1287 100 YALAGGVFFPFFWLAGAGSAVFWVLGATLVVIGSBAAFHQ-----IEPAD-GEQMEPV 151  
mmu23371 100 YALAGGVFFPFFWLAGAGSAVFWVLGATLVVIGSBAAFHQ-----MEPAD-GEQMEPV 151  
dre9288 99 LGLAGGVFFPFFWLAGAGSAVFWVLGATLVVIGSBAAFHPEDELLME-----PV----- 147  
tni12462 100 MSLAGAVSLPFWLWLAGAGAAVFWVLGATLVVIGSBAAFHQ-----LELSDV--EEL---LMEPV 153  
Pp\_70836 95 AFGVNGVFLVLMVYCKIALALFVAGVSLVVVVHSCIFRTQVAKYPAPARSS-GEKPRRS 154  
Op04g03780 98 GVACAAATAIFFWK--FITVFFSAASVALAFAAABAVVVPETDEDESGADD-YVPPQVS 155  
Ot04g03930 94 SLTLVLGVLILVFWSS--FLTIVARGCIAGGVFALAAHVAVVPETDEDESGEIPL---LRDFA 149  
cme517 100 FGVAAA---LVAYGVDAITTSSTLVVAALLALVBSACHKCNVDFEAN-----LPNGR 148  
Os81\_00405 93 MALLGMLAILEVWESVRYCRERWGLAPGVGQFLHSAQIGVSNVFLHN-----KSLERKI 147  
AT4G27540. 94 IIGGQCAAVLTLFLNVQMLFSAALAIYSVMILHAGHFK---LTPSKKPTR-GR----- 144  
Pt\_827597 94 VRTAQCVTAIVLLCLNVQMAFFCAVGSYTMVILHAGHFK---LTPAKQAR-SR----- 144  
Pt\_834101 94 VRAAQCVAAVLLCLNVQMAFFCALGVSYTMVIMHAGHFK---LTPAQKPTR-SR----- 144  
Ot07g01370 96 AGVPRKVLALVLFATANTAVRSVMVTSVVAVIMHAGHFKPIDGFLANIDAQA-GFMKAWI 155  
Cr\_187088 93 WAAELLVGLLVYVSHAVLTLCAWILLGVGLPLMBAHTELPNAKIASAREEFR-AVMRGYQ 152  
AT3G11397. 97 FVLLGLTASFVWFTSCGLWVLYALTALLMILLHASEITPNARLNTFREEFR-AVWRNYS 156  
AT5G05987. 97 WITFLTASLVWVWSSCGLLWVLYALLTSLAVIIVHASEITPNARLNTFREEFR-AVWRNYS 156  
Pt\_563944 97 VLLFSAVSVFLWYASGSLLYESWALISGLLVIVHASEITPNARLNTFREEFR-AVWRNYS 156  
Pt\_822444 97 VLLFSAASFLWYSSGSLLYESWAYAISIFVTVLHASEITPNARLNTFREEFR-AVWRNYS 156  
AT5G02040. 97 VLTCSLVSFALWYISSGLLRVSVALLIAHLATILHASEITPNARLNTFREEFR-AVWRNYS 156  
Pt\_831908 97 VMTFVSFVFTLVWVSCGLLTVLWALAIGLLATILHASEITPNARLNTFREEFR-AVWRNYS 156  
Os67\_06293 97 VVLFVSVCFLVWMTSCSLLTVLWALIVGLLATILHASEITPNARLNTFREEFR-AVWRNYS 156  
Os82\_03597 97 VLLFSAVSCMLWLTSCSLLTVLWALIAIFATLLHASEITPNARLNTFREEFR-AVWRNYS 156  
Pp\_162836 97 ATILASAGALLWVKSSAVVTTICGASILALSIPILHASEITPNARLNTFREEFR-AVWRNYS 156  
Pp\_221990 97 VAGLGFVITLWVWYSAAVLTVFGSLLIGIAPVFLHATITPNARLNTFREEFR-AVWRNYS 156  
Pp\_227785 97 VAGLGVLTALWVWYSAVITLGLALIIGITLHASEITPNARLNTFREEFR-AVWRNYS 156  
cel5147 97 LGGITLVAYFFISVQSVLVVAFALFPVFLVHASEITLRGNRAANVRTSVM-GQLDRT 156  
dme2861 100 AGALLG-GYLLHLLSALLTIFTVLLPISLTFHASEITLRNNKLTNSAPSTPMGSLDAL 159  
hsa32764 92 LAAVLAVGLLVWVAGGACTFLFSIAGPVLLLVHASEITLRNNKLENKKRTPM-GLLLEAL 151  
mmu28592 92 LAAVLAIIFLWLVWAGGACTFLFSITAPVFLILHASEITLRNNKLENKKRTPM-GLLLEAL 151  
dre22987 95 LAAILGSSYLFVSVLGGVAVFLVGIAPFILMLVHASEITLRNNKLENKKRTPM-GLVLEAL 154  
tni2594 98 LSLT--FNGYLFMSVLGGVFLVGVAFILMLVHASEITLRNNKLENKKRTPM-GLLLEAL 155  
cin1427 94 VAGVGVSTVAMVYLSIAAFVFSIALPMLLILHASEITLRNNKLENKKRTPM-GVIMRAL 153  
tni26839 98 VLVLVVASYLILSLLSVMVMSAATFPLVCFHASEITLRNNKLENKKRTPM-GLLLEAL 157  
tni25068 96 VIGVMVSYFLLSLSCGVMVFIIGITFPLLLILHASEITLRNNKLENKKRTPM-GVIMDLL 155  
dre14921 92 VVAVMGIYFLLSLSCGVMVVFPGITFPLMLLILHASEITLRNNKLENKKRTPM-GVILDDL 151  
hsa22741 94 VVVVMLASYFLISMFGVMVVFPGITFPLLLMFIHASEITLRNNKLENKKRTPM-GIVLDAL 153  
mmu22402 94 VVVVMLASYFLISMFGVMVVFPGITFPLLLMFIHASEITLRNNKLENKKRTPM-GIILDAL 153  
rno21900 94 VVVVMLASYFLISMFGVMVVFPGITFPLLLMFIHASEITLRNNKLENKKRTPM-GIILDAL 153  
cme1623 100 GGLLTL---MFLTDVVALALTSASLAAAVTLAAHALHDPVAVLSARNAEYTVAP----- 151  
cme3337 99 WVLV--FSLVLLWLTGAGATFSTLTFVVAITATAAATKPPADPFESG-----IPGA- 148  
Pt\_594536 97 LGLIAVAMIIELLATEAGLHLVITSAAVTVPIVLIHVLVWRDDFCVEEGGGGG-GELVPLV 156  
Pt\_827148 97 LGLIAVAMIIELLATEAGLHLVITSAAVTVPIVLIHVLVWRDDFCVEEGGGGG-GELVPLV 156  
AT5G56230. 100 LLPLFSAVVAIWFNTNSAVNLAVGVSVGLLCLIIHVAHNSDELFLDEDAING-GLIGSNL 159  
AT1G55640. 100 FGLT-LGSLWALWFINSLOCLILGVVTVSLLCLVBAIENSDDLFLVQEKDVVV-PSNFLHW 158  
Pt\_550673 100 IICGLVILSVLVCWLSGAAWNLVWCVLIGFLVCAIHAVLNSDGLLVGEEAAVFGSVSGYV 160  
AT4G29658. 100 LVLL-VLIGIFLLTDVSRGTVIGVLAGLWVVLVGMORTEMLFVLEDDDEEK-VAMNTSS 158  
Op11g00150 100 MGMSALSAPVIFMLTSAGTVLFSGLVALLGVGAAARVPDDLFLVEDANDNK-GF-FSFL 158  
Ot11g00120 100 MGMTALSAPVIFMLTSAGTVLFSGLVALLGVGAAARVPDDLFLVEDAESNK-GF-FSFL 158  
AT1G04260. 100 AVLLIGLIGSGLVTTGVWLRALTTVGFVLLILHAAHRTDSDLVSDDESPLY-GPMLSTS 159  
Pt\_230928 100 LVVLVFLVAVLWVWGGVFNWVGGGIAVVLMLLHAAHRTDSDLVADDETSPLYANLLSDDD 160  
AT1G08770. 100 LVLLSVLTVLAVLYTVDGENVLSLIIIGLLVGAHGAHNTDDLFLDESARRG-GLVSAGS 159  
AT1G17700. 100 LIIMSIVTSLIFLPLTDAKLNIAVAIVAGALAVLSHAAVKTEDLFTQDEETSLNLP----- 155  
Pt\_595411 100 LCVLGLVITLALVFTHVGLNVLIALIIGVIVVGVHAAHRTEDLFLDEESAVE-GGLLSVV 159  
Pt\_651854 100 LGLLSIVTIIALIFTHVWLVLSVLIIGAAVVVHAAHRTENLYLDEHDLAD-EGLSFV 159  
Pt\_551089 100 LGLLGVAVIIIVALLFTHVWLVLSLIIIGAAVVVHAAHRTDDMYSDDQVAD-EGLSFV 159  
Pt\_754227 93 LGLLGVAVIIIVALLFTHVWLVLSLIIIGAAVVVHAAHRTDLYLDEMSPSRDPVPEF 153  
Os67\_00962 100 LAALAAVTLVLELLTGATANVSSLLIGVLLVVLHAAHRTENLHAKENDEFVND-----TISFTLL 154  
Os82\_01045 100 LAVLSVTLVLELLTGATVNLTSLLVGVVVLVHAAHRTENLHAKENDEFVND-----TISFTLL 154  
Pt\_288981 100 MIVLGVTLIFLFLTHVWLVLSLIIIGVLLVVLHAAHRTENLHAKENDEFVND-----TISFTLL 154  
AT1G5190. 100 LIGSVLIVVMLLTHATSNLIGSLLTAVALVLLHAAHRTENLHAKENDEFVND-----TISFTLL 154  
AT3G13710. 100 LIGSVLIVVMLLTHATSNLIGSLLTAVALVLLHAAHRTENLHAKENDEFVND-----TISFTLL 154  
AT3G13720. 100 LIGSVLIVVMLLTHATSNLIGSLLTAVALVLLHAAHRTENLHAKENDEFVND-----TISFTLL 154  
Cr\_171434 100 IGMASISFIFLFFLTSVGTVFSALSISIALIALHAGHFK---LTPAKQAR-SR----- 144  
Os69\_05922 100 LAALSVAIVLAVALSRAGLNLLVSVLAAAAIAGHAAHRTENLHAKENDEFVND-----TISFTLL 154  
Os69\_05367 100 LAALTVAVIALLFTNVGWNVIGSVMIGAAVVAHAAHRTENLHAKENDEFVND-----TISFTLL 154  
Pp\_216234 100 LLGMSLFTVAVLVMFTNVGSTHISALAIIGAAICFHHAAHRTENLHAKENDEFVND-----TISFTLL 154  
Pp\_109789 100 FLGMSVFTVIMVMTNVGSIILISALIIIGAAICFHHAAHRTENLHAKENDEFVND-----TISFTLL 154  
Pp\_119721 100 LLGMSLFTIIMIFMTSVGSIILISALIIIGAAICFHHAAHRTENLHAKENDEFVND-----TISFTLL 154  
Pp\_196148 100 LLGMSVFTIIMIFMTSVGSIILISALIIIGAAICFHHAAHRTENLHAKENDEFVND-----TISFTLL 154  
AT5G07110. 100 LGLLCLSIVVVMFTSVGSLIMSTLAVGIMGVAIEGAAHRTENLHAKENDEFVND-----TISFTLL 154  
Pt\_809747 100 LGLLVLVAVIIVFLTSVGSLLITAVLVGVGIVCVHAAHRTENLHAKENDEFVND-----TISFTLL 154  
Os86\_00075 100 LGLLIVASAFVIFLTSVGSLLIFSALALGAAIVCAHAAHRTENLHAKENDEFVND-----TISFTLL 154  
Os11687\_00 100 LGLLIVASAFVIFLTSVGSLLIFSALALGAAIVCAHAAHRTENLHAKENDEFVND-----TISFTLL 154  
Os67\_06093 98 LGLLIVASAFVIFLTSVGSLLIFSALALGAAIVCAHAAHRTENLHAKENDEFVND-----TISFTLL 154  
Os82\_03767 100 LGLLV-VASFVAFFFTSVASLIIISGLLVGGAIIVAGHAAHRTENLHAKENDEFVND-----TISFTLL 154  
AT5G01640. 100 LGLLILSTIAVIFFTSVGSLLISALMIGIATICVHAAHRTENLHAKENDEFVND-----TISFTLL 154  
Pt\_724377 100 LGLLIVSVIIVVIFLTSVGSLLISASVGFALVCAHAAHRTENLHAKENDEFVND-----TISFTLL 154  
Pt\_832605 100 LGLLIVSVIIVVIFLTSVGSLLISALMVGFAIVCAHAAHRTENLHAKENDEFVND-----TISFTLL 154  
AT5G05380. 100 LGLVLLIIVVIFLTSVGSLLISALMIGIATICVHAAHRTENLHAKENDEFVND-----TISFTLL 154  
AT2G40380. 100 LGLLIVSVIIVVIFLTSVGSLLISALMIGIATICVHAAHRTENLHAKENDEFVND-----TISFTLL 154  
AT3G56110. 100 LGLLIVSVIIVVIFLTSVGSLLISALMIGIATICVHAAHRTENLHAKENDEFVND-----TISFTLL 154  
AT2G38360. 100 LGLLILSVIIVVIFLTDVGSVLSAMMIGVALICAHAAHRTENLHAKENDEFVND-----TISFTLL 154  
Pt\_560953 100 LGLLIALSVVIFLTSVGSVLIISALLVGVGIVCAHAAHRTENLHAKENDEFVND-----TISFTLL 154  
Pt\_577062 100 LGLLIVSVIIVVIFLTVNGSVLISALLVGVGIVCAHAAHRTENLHAKENDEFVND-----TISFTLL 154

**Figure S4.** Sequence alignments of PRA1 proteins. The program hmmsearch from the HMMER package together with the PRA1 PFAM domain (PF03208) was used to identify putative *PRA1* genes, as well as BLASTP searches with known *PRA1* genes. The PRA1 domain is marked by asterisks above the alignment. Predicted protein annotations were kept as retrieved from different used databases. Protein sequences were aligned with T-Coffee and manually edited with BioEdit. Conserved and identical amino acids are marked in grey and black, respectively.
